# Supplementary material for: Refining the adipose progenitor cell landscape in healthy and obese visceral adipose tissue using single-cell gene expression profiling
Source: Life Sci Alliance. 2019 Nov 25;2(6):e201900561. doi: 10.26508/lsa.201900561 (PMC6878222; doi:10.26508/lsa.201900561)
Supplement: Supplementary file 3 [file LSA-2019-00561_TableS3.xlsx]

## Sheet: Sheet1
Gene symbol	Gene ID	Score(d)	Numerator(r)	Denominator(s+s0)	Fold Change	q-value(%)	UP or DOWN in cluster 2 vs. cluster 4 and 6
Has1	ENSMUSG00000003665	7.59361	0.701306	0.0923547	1.62598	0	UP
Mmp23	ENSMUSG00000029061	-11.8566	-0.59215	0.0499426	-1.50749	0	DOWN
S100a10	ENSMUSG00000041959	-11.3207	-0.594034	0.0524735	-1.50946	0	DOWN
Gstm5	ENSMUSG00000004032	-10.1965	-0.595756	0.0584277	-1.51126	0	DOWN
Mgst1	ENSMUSG00000008540	-10.9419	-0.596801	0.0545428	-1.51236	0	DOWN
Gadd45g	ENSMUSG00000021453	-7.17518	-0.597612	0.0832888	-1.51321	0	DOWN
Dbi	ENSMUSG00000026385	-9.57953	-0.599486	0.0625799	-1.51518	0	DOWN
Lum	ENSMUSG00000036446	-7.91264	-0.601452	0.0760116	-1.51724	0	DOWN
Tubb5	ENSMUSG00000001525	-10.9925	-0.602186	0.0547816	-1.51802	0	DOWN
Myl12a	ENSMUSG00000024048	-12.7075	-0.603551	0.0474956	-1.51945	0	DOWN
Anxa2	ENSMUSG00000032231	-9.71632	-0.604037	0.0621672	-1.51996	0	DOWN
Tubb6	ENSMUSG00000001473	-11.1351	-0.61042	0.0548196	-1.5267	0	DOWN
Cyba	ENSMUSG00000006519	-11.6461	-0.611752	0.0525283	-1.52811	0	DOWN
Tmbim6	ENSMUSG00000023010	-12.8789	-0.615435	0.0477862	-1.53202	0	DOWN
H3f3b	ENSMUSG00000016559	-9.89366	-0.616789	0.0623418	-1.53346	0	DOWN
Ifitm3	ENSMUSG00000025492	-12.6648	-0.618039	0.0487995	-1.53479	0	DOWN
Zfp36	ENSMUSG00000044786	-9.25952	-0.61858	0.0668048	-1.53536	0	DOWN
Klf4	ENSMUSG00000003032	-7.70244	-0.62274	0.0808496	-1.5398	0	DOWN
Sepp1	ENSMUSG00000064373	-12.3366	-0.624956	0.0506586	-1.54216	0	DOWN
Cfl1	ENSMUSG00000056201	-13.7556	-0.62714	0.0455918	-1.5445	0	DOWN
Lpl	ENSMUSG00000015568	-7.34224	-0.628357	0.0855811	-1.5458	0	DOWN
Steap4	ENSMUSG00000012428	-9.98016	-0.630774	0.0632029	-1.5484	0	DOWN
Dnaja1	ENSMUSG00000028410	-10.6227	-0.63082	0.0593843	-1.54844	0	DOWN
Sfr1	ENSMUSG00000025066	-12.9423	-0.635072	0.0490694	-1.55302	0	DOWN
Emp3	ENSMUSG00000040212	-12.2234	-0.636345	0.0520594	-1.55439	0	DOWN
Morf4l2	ENSMUSG00000031422	-13.2463	-0.640484	0.048352	-1.55885	0	DOWN
Pdia3	ENSMUSG00000027248	-12.8538	-0.652236	0.0507427	-1.5716	0	DOWN
Btg2	ENSMUSG00000020423	-9.73736	-0.652921	0.0670532	-1.57235	0	DOWN
Dpep1	ENSMUSG00000019278	-11.5464	-0.660924	0.0572406	-1.58109	0	DOWN
Capns1	ENSMUSG00000001794	-14.0614	-0.661223	0.047024	-1.58142	0	DOWN
Pfn1	ENSMUSG00000018293	-13.9418	-0.662645	0.0475293	-1.58298	0	DOWN
Prkcdbp	ENSMUSG00000037060	-12.2751	-0.667711	0.0543958	-1.58855	0	DOWN
Aldh2	ENSMUSG00000029455	-13.3037	-0.671198	0.0504519	-1.5924	0	DOWN
Cdc42	ENSMUSG00000006699	-14.6063	-0.67556	0.0462514	-1.59722	0	DOWN
Neat1	ENSMUSG00000092274	-9.28735	-0.677483	0.0729469	-1.59935	0	DOWN
Id3	ENSMUSG00000007872	-9.08454	-0.678497	0.0746869	-1.60047	0	DOWN
Serpinf1	ENSMUSG00000000753	-10.8038	-0.681056	0.0630389	-1.60331	0	DOWN
Ctsl	ENSMUSG00000021477	-11.9387	-0.682568	0.0571727	-1.60499	0	DOWN
Hspa8	ENSMUSG00000015656	-11.1978	-0.692804	0.0618695	-1.61642	0	DOWN
Cp	ENSMUSG00000003617	-10.7722	-0.699645	0.0649494	-1.6241	0	DOWN
Aldoa	ENSMUSG00000030695	-14.6434	-0.70147	0.0479034	-1.62616	0	DOWN
Anxa5	ENSMUSG00000027712	-13.3657	-0.706359	0.0528488	-1.63168	0	DOWN
Calr	ENSMUSG00000003814	-12.9432	-0.706382	0.0545755	-1.63171	0	DOWN
Laptm4a	ENSMUSG00000020585	-15.0424	-0.712633	0.0473749	-1.63879	0	DOWN
Fosb	ENSMUSG00000003545	-9.12228	-0.713653	0.0782319	-1.63995	0	DOWN
Penk	ENSMUSG00000045573	-10.1958	-0.719253	0.0705441	-1.64633	0	DOWN
Ifitm2	ENSMUSG00000060591	-15.2336	-0.722743	0.0474441	-1.65032	0	DOWN
Cyb5a	ENSMUSG00000024646	-14.7639	-0.723112	0.0489783	-1.65074	0	DOWN
Col3a1	ENSMUSG00000026043	-11.0271	-0.73355	0.0665223	-1.66273	0	DOWN
Prdx1	ENSMUSG00000028691	-15.2115	-0.746766	0.0490922	-1.67803	0	DOWN
Itm2b	ENSMUSG00000022108	-17.1904	-0.750089	0.0436341	-1.6819	0	DOWN
Nupr1	ENSMUSG00000030717	-11.3166	-0.750822	0.0663472	-1.68275	0	DOWN
Cd63	ENSMUSG00000025351	-15.7223	-0.755913	0.0480792	-1.6887	0	DOWN
Atf3	ENSMUSG00000026628	-11.1758	-0.761372	0.0681269	-1.6951	0	DOWN
H2-D1	ENSMUSG00000073411	-15.8345	-0.76267	0.048165	-1.69663	0	DOWN
Lgals1	ENSMUSG00000068220	-14.8607	-0.77444	0.0521132	-1.71053	0	DOWN
Cd81	ENSMUSG00000037706	-15.8226	-0.78987	0.0499202	-1.72892	0	DOWN
Hsd11b1	ENSMUSG00000016194	-11.5451	-0.790483	0.068469	-1.72965	0	DOWN
Klf6	ENSMUSG00000000078	-11.1558	-0.793347	0.0711149	-1.73309	0	DOWN
Igfbp7	ENSMUSG00000036256	-13.7335	-0.794854	0.0578771	-1.7349	0	DOWN
Rsrp1	ENSMUSG00000037266	-13.1635	-0.80143	0.0608827	-1.74283	0	DOWN
Fabp4	ENSMUSG00000062515	-7.83357	-0.80309	0.102519	-1.74483	0	DOWN
Apoe	ENSMUSG00000002985	-8.04762	-0.817152	0.10154	-1.76192	0	DOWN
Dusp1	ENSMUSG00000024190	-11.8097	-0.821817	0.0695885	-1.76763	0	DOWN
Gm8797	ENSMUSG00000103034	-15.0013	-0.8304	0.055355	-1.77818	0	DOWN
Vim	ENSMUSG00000026728	-14.5669	-0.831059	0.057051	-1.77899	0	DOWN
Trf	ENSMUSG00000032554	-7.96314	-0.834558	0.104803	-1.78331	0	DOWN
Anxa1	ENSMUSG00000024659	-14.0982	-0.837686	0.0594178	-1.78718	0	DOWN
Klf2	ENSMUSG00000055148	-9.75828	-0.842703	0.0863578	-1.79341	0	DOWN
Tuba1b	ENSMUSG00000023004	-14.4954	-0.854678	0.0589619	-1.80836	0	DOWN
Cst3	ENSMUSG00000027447	-12.8734	-0.880401	0.0683893	-1.84089	0	DOWN
Serpinh1	ENSMUSG00000070436	-17.1901	-0.881167	0.0512602	-1.84186	0	DOWN
Igf1	ENSMUSG00000020053	-9.79767	-0.882792	0.0901023	-1.84394	0	DOWN
Ubc	ENSMUSG00000008348	-14.744	-0.884449	0.0599871	-1.84606	0	DOWN
Sult1e1	ENSMUSG00000029272	-9.72924	-0.889921	0.0914687	-1.85307	0	DOWN
Sparc	ENSMUSG00000018593	-15.9641	-0.918795	0.0575537	-1.89054	0	DOWN
Dcn	ENSMUSG00000019929	-17.0293	-0.919435	0.0539912	-1.89137	0	DOWN
Gstm1	ENSMUSG00000058135	-17.0138	-0.96952	0.0569842	-1.95819	0	DOWN
Ubb	ENSMUSG00000019505	-17.4097	-1.0184	0.058496	-2.02567	0	DOWN
Jund	ENSMUSG00000071076	-15.2834	-1.05496	0.0690265	-2.07766	0	DOWN
Fos	ENSMUSG00000021250	-12.7993	-1.16273	0.0908432	-2.23881	0	DOWN
Tuba1a	ENSMUSG00000072235	-18.4816	-1.27815	0.069158	-2.42527	0	DOWN
Jun	ENSMUSG00000052684	-15.3406	-1.27816	0.083319	-2.4253	0	DOWN
