# Supplementary material for: Refining the adipose progenitor cell landscape in healthy and obese visceral adipose tissue using single-cell gene expression profiling
Source: Life Sci Alliance. 2019 Nov 25;2(6):e201900561. doi: 10.26508/lsa.201900561 (PMC6878222; doi:10.26508/lsa.201900561)
Supplement: Supplementary file 4 [file LSA-2019-00561_TableS4.xlsx]

## Sheet: Sheet1
Gene symbol	Gene ID	Score(d)	Numerator(r)	Denominator(s+s0)	Fold Change	q-value(%)	UP or DOWN in cluster 4 vs. cluster 2 and 6
Sult1e1	ENSMUSG00000029272	18.8705	1.65428	0.0876653	3.14767	0	UP
Apoe	ENSMUSG00000002985	16.5716	1.63704	0.0987861	3.11027	0	UP
Igf1	ENSMUSG00000020053	17.245	1.51913	0.0880906	2.86617	0	UP
Fabp4	ENSMUSG00000062515	14.6437	1.49021	0.101764	2.80929	0	UP
Jun	ENSMUSG00000052684	15.8848	1.3835	0.0870958	2.609	0	UP
Trf	ENSMUSG00000032554	13.0781	1.38319	0.105764	2.60845	0	UP
Fos	ENSMUSG00000021250	14.1092	1.33058	0.0943058	2.51504	0	UP
Inmt	ENSMUSG00000003477	12.8483	1.30142	0.101291	2.46472	0	UP
Rsrp1	ENSMUSG00000037266	19.7604	1.17334	0.0593781	2.25533	0	UP
Jund	ENSMUSG00000071076	15.2605	1.10797	0.0726037	2.15542	0	UP
Col6a5	ENSMUSG00000091345	14.7846	1.08162	0.0731583	2.11641	0	UP
Steap4	ENSMUSG00000012428	17.3297	1.06997	0.0617418	2.09939	0	UP
Socs3	ENSMUSG00000053113	13.1141	1.04488	0.0796764	2.0632	0	UP
Cp	ENSMUSG00000003617	15.4891	1.01066	0.0652496	2.01483	0	UP
Cst3	ENSMUSG00000027447	14.245	1.01047	0.070935	2.01456	0	UP
Penk	ENSMUSG00000045573	13.8492	0.993683	0.0717503	1.99126	0	UP
Dcn	ENSMUSG00000019929	17.6141	0.993183	0.0563858	1.99057	0	UP
Gadd45g	ENSMUSG00000021453	11.5138	0.976697	0.0848283	1.96795	0	UP
Dpep1	ENSMUSG00000019278	16.8499	0.960452	0.0570005	1.94592	0	UP
Gstm1	ENSMUSG00000058135	15.7491	0.957359	0.060788	1.94175	0	UP
Zfp36	ENSMUSG00000044786	14.0284	0.944909	0.067357	1.92507	0	UP
Id3	ENSMUSG00000007872	12.229	0.935998	0.076539	1.91321	0	UP
Tuba1a	ENSMUSG00000072235	11.7935	0.921005	0.0780942	1.89343	0	UP
Hsd11b1	ENSMUSG00000016194	12.4805	0.89101	0.0713922	1.85447	0	UP
Hp	ENSMUSG00000031722	8.29749	0.867773	0.104583	1.82484	0	UP
Gdf10	ENSMUSG00000021943	12.5068	0.864675	0.0691364	1.82093	0	UP
Dusp1	ENSMUSG00000024190	11.7304	0.859009	0.0732295	1.81379	0	UP
Ldhb	ENSMUSG00000030246	17.591	0.849304	0.0482806	1.80163	0	UP
Atf3	ENSMUSG00000026628	11.8038	0.840989	0.0712475	1.79128	0	UP
Gas1	ENSMUSG00000052957	10.1783	0.825191	0.0810739	1.77177	0	UP
Ubb	ENSMUSG00000019505	12.7633	0.825122	0.0646481	1.77168	0	UP
Gstm5	ENSMUSG00000004032	13.6129	0.811008	0.0595762	1.75444	0	UP
Bmper	ENSMUSG00000031963	16.2768	0.808607	0.0496786	1.75152	0	UP
Agt	ENSMUSG00000031980	17.6054	0.792983	0.045042	1.73265	0	UP
Sepp1	ENSMUSG00000064373	14.9316	0.774726	0.0518851	1.71087	0	UP
Cpxm1	ENSMUSG00000027408	13.2652	0.766909	0.0578136	1.70162	0	UP
Nupr1	ENSMUSG00000030717	10.6249	0.745616	0.0701764	1.67669	0	UP
Cyb5a	ENSMUSG00000024646	14.298	0.740022	0.051757	1.6702	0	UP
H2-Q4	ENSMUSG00000035929	11.6084	0.735976	0.0634003	1.66552	0	UP
Btg2	ENSMUSG00000020423	10.3015	0.723171	0.0702005	1.65081	0	UP
Dnaja1	ENSMUSG00000028410	11.6793	0.722694	0.0618782	1.65026	0	UP
Zfp36l2	ENSMUSG00000045817	11.318	0.722522	0.0638386	1.65006	0	UP
Figf	ENSMUSG00000031380	11.9696	0.72139	0.0602684	1.64877	0	UP
Pnp	ENSMUSG00000021871	10.998	0.717488	0.0652381	1.64432	0	UP
Cyba	ENSMUSG00000006519	13.1196	0.714785	0.0544824	1.64124	0	UP
Slc10a6	ENSMUSG00000029321	10.3667	0.700732	0.0675943	1.62533	0	UP
Fosb	ENSMUSG00000003545	8.46478	0.699551	0.0826425	1.624	0	UP
6030408B16Rik	ENSMUSG00000075408	12.6081	0.694274	0.0550657	1.61807	0	UP
Srpx	ENSMUSG00000090084	12.9229	0.689761	0.0533752	1.61302	0	UP
Apod	ENSMUSG00000022548	10.5008	0.684159	0.0651531	1.60676	0	UP
Ogn	ENSMUSG00000021390	10.9753	0.683906	0.0623134	1.60648	0	UP
Ifi205	ENSMUSG00000054203	11.0132	0.681246	0.0618572	1.60352	0	UP
Ubc	ENSMUSG00000008348	10.312	0.678009	0.0657493	1.59993	0	UP
Lpl	ENSMUSG00000015568	7.5136	0.675486	0.0899017	1.59713	0	UP
Gm8797	ENSMUSG00000103034	10.8471	0.657387	0.0606048	1.57722	0	UP
Itm2b	ENSMUSG00000022108	13.6017	0.649111	0.0477229	1.5682	0	UP
Fam150b	ENSMUSG00000054204	7.66564	0.645612	0.0842215	1.5644	0	UP
Hspa8	ENSMUSG00000015656	9.80379	0.645196	0.0658109	1.56395	0	UP
Fgl2	ENSMUSG00000039899	6.42065	0.642367	0.100047	1.56089	0	UP
Tuba1b	ENSMUSG00000023004	9.88438	0.63929	0.0646768	1.55756	0	UP
Aldh2	ENSMUSG00000029455	11.8893	0.639273	0.0537686	1.55754	0	UP
Sparcl1	ENSMUSG00000029309	9.3111	0.639082	0.0686366	1.55734	0	UP
Klf6	ENSMUSG00000000078	8.26606	0.631854	0.0764395	1.54955	0	UP
H3f3b	ENSMUSG00000016559	9.59056	0.630203	0.0657107	1.54778	0	UP
Cxcl12	ENSMUSG00000061353	9.36522	0.62333	0.066558	1.54043	0	UP
Gstm2	ENSMUSG00000040562	11.4356	0.62216	0.0544054	1.53918	0	UP
Ifitm2	ENSMUSG00000060591	12.0511	0.620775	0.0515118	1.5377	0	UP
Col6a6	ENSMUSG00000043719	12.911	0.619489	0.0479817	1.53633	0	UP
Dnajb1	ENSMUSG00000005483	8.57203	0.617723	0.0720625	1.53445	0	UP
Btg1	ENSMUSG00000036478	9.73814	0.615892	0.0632453	1.5325	0	UP
Vwa1	ENSMUSG00000042116	11.713	0.613063	0.0523403	1.5295	0	UP
Ggt5	ENSMUSG00000006344	12.1152	0.609658	0.0503219	1.5259	0	UP
Ctsl	ENSMUSG00000021477	9.90262	0.605653	0.0611608	1.52167	0	UP
Mmp23	ENSMUSG00000029061	11.3912	0.600724	0.0527359	1.51648	0	UP
Aldh1a1	ENSMUSG00000053279	13.4955	0.593516	0.0439788	1.50892	0	UP
Klf2	ENSMUSG00000055148	6.35676	0.590001	0.0928146	1.50525	0	UP
H2-D1	ENSMUSG00000073411	11.0222	0.585872	0.0531537	1.50095	0	UP
Cilp	ENSMUSG00000042254	-7.82998	-0.597135	0.0762626	-1.51271	0	DOWN
Ifi27l2a	ENSMUSG00000079017	-8.85239	-0.630981	0.071278	-1.54862	0	DOWN
Gfpt2	ENSMUSG00000020363	-10.1843	-0.662833	0.0650835	-1.58319	0	DOWN
Lsp1	ENSMUSG00000018819	-10.5058	-0.669828	0.063758	-1.59088	0	DOWN
Fn1	ENSMUSG00000026193	-10.1124	-0.675513	0.0668003	-1.59716	0	DOWN
Pi16	ENSMUSG00000024011	-8.21295	-0.677233	0.0824591	-1.59907	0	DOWN
Fbn1	ENSMUSG00000027204	-12.1936	-0.685954	0.0562552	-1.60877	0	DOWN
Cdkn1a	ENSMUSG00000023067	-8.45865	-0.704358	0.0832707	-1.62942	0	DOWN
Ackr3	ENSMUSG00000044337	-10.0672	-0.719715	0.0714913	-1.64686	0	DOWN
Aspn	ENSMUSG00000021388	-10.1767	-0.753751	0.0740663	-1.68617	0	DOWN
Ptgs2	ENSMUSG00000032487	-9.15886	-0.756638	0.0826126	-1.68955	0	DOWN
Crip1	ENSMUSG00000006360	-10.1211	-0.76299	0.0753861	-1.697	0	DOWN
Ugdh	ENSMUSG00000029201	-10.3048	-0.826728	0.0802279	-1.77366	0	DOWN
Col14a1	ENSMUSG00000022371	-13.8139	-0.851481	0.0616394	-1.80435	0	DOWN
Has1	ENSMUSG00000003665	-14.0759	-1.29592	0.0920669	-2.45534	0	DOWN
