# Supplementary material for: Refining the adipose progenitor cell landscape in healthy and obese visceral adipose tissue using single-cell gene expression profiling
Source: Life Sci Alliance. 2019 Nov 25;2(6):e201900561. doi: 10.26508/lsa.201900561 (PMC6878222; doi:10.26508/lsa.201900561)
Supplement: Supplementary file 5 [file LSA-2019-00561_TableS5.xlsx]

## Sheet: Sheet1
Gene symbol	Gene ID	Score(d)	Numerator(r)	Denominator(s+s0)	Fold Change	q-value(%)	UP or DOWN in cluster 6 vs. cluster 2 and 4
Crip1	ENSMUSG00000006360	18.9985	1.64628	0.0866531	3.13025	0	UP
Aspn	ENSMUSG00000021388	18.7901	1.60449	0.08539	3.04087	0	UP
Tppp3	ENSMUSG00000014846	15.8396	1.4686	0.092717	2.76754	0	UP
Bgn	ENSMUSG00000031375	13.1164	1.39752	0.106548	2.63449	0	UP
Anxa2	ENSMUSG00000032231	16.7761	1.29111	0.0769611	2.44716	0	UP
Emp1	ENSMUSG00000030208	13.6435	1.23793	0.0907343	2.3586	0	UP
Postn	ENSMUSG00000027750	15.097	1.23125	0.081556	2.34771	0	UP
Mfap5	ENSMUSG00000030116	16.6353	1.21965	0.073317	2.32891	0	UP
Meg3	ENSMUSG00000021268	9.88553	1.17838	0.119203	2.26323	0	UP
Lgals1	ENSMUSG00000068220	17.5458	1.17608	0.0670292	2.25962	0	UP
Mgp	ENSMUSG00000030218	7.34317	1.15934	0.15788	2.23355	0	UP
Col6a2	ENSMUSG00000020241	14.2613	1.1326	0.0794177	2.19254	0	UP
Lum	ENSMUSG00000036446	11.5495	1.13227	0.0980359	2.19203	0	UP
Sh3bgrl3	ENSMUSG00000028843	16.8436	1.12816	0.0669784	2.18579	0	UP
Pcolce	ENSMUSG00000029718	11.907	1.0989	0.09229	2.14191	0	UP
Crip2	ENSMUSG00000006356	15.1495	1.064	0.0702337	2.09073	0	UP
Fbln2	ENSMUSG00000064080	12.7647	1.05977	0.0830233	2.0846	0	UP
Lsp1	ENSMUSG00000018819	13.5175	1.05733	0.0782188	2.08107	0	UP
Cd9	ENSMUSG00000030342	11.6819	1.05712	0.090492	2.08077	0	UP
Cilp	ENSMUSG00000042254	11.2743	1.05626	0.0936873	2.07953	0	UP
Col3a1	ENSMUSG00000026043	12.0062	1.04981	0.0874387	2.07025	0	UP
Ackr3	ENSMUSG00000044337	11.5595	1.02906	0.0890231	2.0407	0	UP
Fbn1	ENSMUSG00000027204	14.7667	1.02093	0.0691376	2.02923	0	UP
S100a6	ENSMUSG00000001025	16.0612	1.01892	0.0634399	2.0264	0	UP
S100a10	ENSMUSG00000041959	14.7338	0.991713	0.0673088	1.98855	0	UP
S100a11	ENSMUSG00000027907	14.5937	0.9905	0.0678717	1.98687	0	UP
Gas7	ENSMUSG00000033066	12.6408	0.982053	0.0776891	1.97527	0	UP
Lmna	ENSMUSG00000028063	13.2125	0.958588	0.0725518	1.94341	0	UP
Tspo	ENSMUSG00000041736	14.1915	0.955333	0.0673171	1.93903	0	UP
Sparc	ENSMUSG00000018593	12.0266	0.95518	0.0794221	1.93882	0	UP
Tpm4	ENSMUSG00000031799	13.8109	0.950909	0.0688519	1.93309	0	UP
Col6a1	ENSMUSG00000001119	12.7081	0.946325	0.0744662	1.92696	0	UP
Col14a1	ENSMUSG00000022371	11.8102	0.935546	0.0792152	1.91261	0	UP
Mfap4	ENSMUSG00000042436	9.6282	0.921912	0.0957513	1.89462	0	UP
Col8a1	ENSMUSG00000068196	13.3203	0.921227	0.0691597	1.89372	0	UP
Tnxb	ENSMUSG00000033327	13.1482	0.912618	0.0694104	1.88246	0	UP
Fxyd5	ENSMUSG00000009687	13.06	0.910787	0.0697385	1.88007	0	UP
Thbs1	ENSMUSG00000040152	7.03367	0.910645	0.129469	1.87989	0	UP
Fstl1	ENSMUSG00000022816	13.9596	0.908844	0.0651055	1.87754	0	UP
Vim	ENSMUSG00000026728	11.5824	0.902108	0.0778858	1.86879	0	UP
Tagln2	ENSMUSG00000026547	11.0487	0.883816	0.0799928	1.84525	0	UP
Ugdh	ENSMUSG00000029201	8.56075	0.877304	0.10248	1.83694	0	UP
Fn1	ENSMUSG00000026193	10.4063	0.874379	0.0840241	1.83322	0	UP
Anxa5	ENSMUSG00000027712	12.3128	0.87163	0.0707903	1.82973	0	UP
Igfbp6	ENSMUSG00000023046	13.3031	0.867419	0.0652041	1.8244	0	UP
Myl6	ENSMUSG00000090841	13.7974	0.863603	0.0625916	1.81958	0	UP
Nbl1	ENSMUSG00000041120	10.5314	0.850487	0.0807573	1.80311	0	UP
Ctgf	ENSMUSG00000019997	11.7945	0.849323	0.0720101	1.80165	0	UP
Loxl1	ENSMUSG00000032334	11.8518	0.847961	0.0715469	1.79996	0	UP
Actg1	ENSMUSG00000062825	11.6092	0.842548	0.0725761	1.79321	0	UP
Vcan	ENSMUSG00000021614	12.1505	0.833466	0.0685949	1.78196	0	UP
Serpinf1	ENSMUSG00000000753	9.85776	0.830272	0.0842252	1.77802	0	UP
Tnfrsf12a	ENSMUSG00000023905	11.1401	0.828937	0.0744103	1.77638	0	UP
Has1	ENSMUSG00000003665	6.72292	0.82733	0.123061	1.7744	0	UP
Serpinh1	ENSMUSG00000070436	11.31	0.817247	0.0722587	1.76204	0	UP
Myl12a	ENSMUSG00000024048	12.9904	0.815806	0.0628008	1.76028	0	UP
Arpc1b	ENSMUSG00000029622	12.9105	0.811486	0.0628549	1.75502	0	UP
Rps27l	ENSMUSG00000036781	10.9355	0.807849	0.0738743	1.7506	0	UP
Prkcdbp	ENSMUSG00000037060	11.0445	0.80542	0.0729249	1.74765	0	UP
Olfml3	ENSMUSG00000027848	11.343	0.787622	0.069437	1.72623	0	UP
Tuba1a	ENSMUSG00000072235	7.70585	0.78268	0.10157	1.72032	0	UP
Dpt	ENSMUSG00000026574	11.9663	0.782602	0.0654005	1.72023	0	UP
Ccl7	ENSMUSG00000035373	5.36066	0.77964	0.145437	1.7167	0	UP
Col1a1	ENSMUSG00000001506	9.45488	0.77801	0.0822866	1.71476	0	UP
Hmcn2	ENSMUSG00000055632	10.8618	0.777494	0.0715807	1.71415	0	UP
Loxl2	ENSMUSG00000034205	11.9495	0.776575	0.0649881	1.71306	0	UP
Pi16	ENSMUSG00000024011	7.4193	0.775212	0.104486	1.71144	0	UP
Cyr61	ENSMUSG00000028195	7.29313	0.774253	0.106162	1.7103	0	UP
Emp3	ENSMUSG00000040212	11.0793	0.772663	0.0697395	1.70842	0	UP
Pcolce2	ENSMUSG00000015354	9.59119	0.77097	0.0803832	1.70642	0	UP
Sdc2	ENSMUSG00000022261	10.1941	0.767736	0.0753117	1.7026	0	UP
Fbln1	ENSMUSG00000006369	7.07736	0.761292	0.107567	1.69501	0	UP
Axl	ENSMUSG00000002602	11.0859	0.747148	0.0673963	1.67847	0	UP
Pfn1	ENSMUSG00000018293	11.3594	0.733582	0.0645792	1.66276	0	UP
Anxa3	ENSMUSG00000029484	8.89501	0.726901	0.0817201	1.65508	0	UP
Prss23	ENSMUSG00000039405	9.15793	0.726706	0.0793527	1.65486	0	UP
Phlda1	ENSMUSG00000020205	5.98665	0.726197	0.121303	1.65427	0	UP
Oaf	ENSMUSG00000032014	10.1	0.725054	0.0717878	1.65296	0	UP
Dstn	ENSMUSG00000015932	11.1421	0.72413	0.0649905	1.6519	0	UP
Col6a3	ENSMUSG00000048126	11.3095	0.723893	0.0640076	1.65163	0	UP
Cyb5r3	ENSMUSG00000018042	10.6837	0.723254	0.0676967	1.6509	0	UP
Serpine1	ENSMUSG00000037411	5.61775	0.715902	0.127436	1.64251	0	UP
Klf4	ENSMUSG00000003032	6.6373	0.715884	0.107858	1.64249	0	UP
Calm1	ENSMUSG00000001175	9.82209	0.7027	0.0715429	1.62755	0	UP
Cd248	ENSMUSG00000056481	9.39622	0.702034	0.0747146	1.6268	0	UP
Dynll1	ENSMUSG00000009013	11.1836	0.70064	0.0626486	1.62523	0	UP
Ckb	ENSMUSG00000001270	10.4248	0.698736	0.0670261	1.62308	0	UP
Actb	ENSMUSG00000029580	9.36414	0.696811	0.0744128	1.62092	0	UP
Rhoa	ENSMUSG00000007815	10.837	0.696386	0.0642602	1.62044	0	UP
Tnfaip6	ENSMUSG00000053475	7.28634	0.693482	0.0951756	1.61718	0	UP
Myadm	ENSMUSG00000068566	11.4694	0.691844	0.0603206	1.61535	0	UP
Heg1	ENSMUSG00000075254	9.91309	0.687586	0.0693614	1.61059	0	UP
Ltbp4	ENSMUSG00000040488	9.90396	0.684839	0.069148	1.60752	0	UP
Gnas	ENSMUSG00000027523	11.6401	0.681106	0.0585139	1.60337	0	UP
Ahnak	ENSMUSG00000069833	10.5201	0.680074	0.0646454	1.60222	0	UP
Fkbp1a	ENSMUSG00000032966	11.099	0.677279	0.0610218	1.59912	0	UP
Tmsb4x	ENSMUSG00000049775	10.8435	0.675466	0.0622924	1.59711	0	UP
Col4a1	ENSMUSG00000031502	7.77081	0.668346	0.0860072	1.58925	0	UP
Capg	ENSMUSG00000056737	9.31644	0.666933	0.0715867	1.58769	0	UP
Cd34	ENSMUSG00000016494	9.2806	0.657193	0.0708136	1.57701	0	UP
43358	ENSMUSG00000037072	11.064	0.656542	0.0593404	1.5763	0	UP
S100a16	ENSMUSG00000074457	10.1329	0.654396	0.0645817	1.57396	0	UP
Slc25a5	ENSMUSG00000016319	8.78661	0.652787	0.0742933	1.5722	0	UP
Rap1a	ENSMUSG00000068798	9.83893	0.650024	0.0660665	1.56919	0	UP
Bhlhe40	ENSMUSG00000030103	9.04705	0.648376	0.0716672	1.5674	0	UP
Cd55	ENSMUSG00000026399	8.75353	0.645542	0.0737464	1.56433	0	UP
Pdlim2	ENSMUSG00000022090	10.1434	0.644616	0.06355	1.56332	0	UP
Atox1	ENSMUSG00000018585	10.2005	0.642728	0.0630093	1.56128	0	UP
Arpc2	ENSMUSG00000006304	10.1673	0.641149	0.0630599	1.55957	0	UP
Thy1	ENSMUSG00000032011	12.3884	0.636837	0.0514058	1.55492	0	UP
Ifrd1	ENSMUSG00000001627	7.7381	0.635157	0.0820818	1.55311	0	UP
Col1a2	ENSMUSG00000029661	9.54077	0.633588	0.0664085	1.55142	0	UP
Pmepa1	ENSMUSG00000038400	10.8762	0.630637	0.0579835	1.54825	0	UP
S100a13	ENSMUSG00000042312	10.27	0.628303	0.0611783	1.54575	0	UP
Cd63	ENSMUSG00000025351	9.2715	0.627755	0.067708	1.54516	0	UP
Sgk1	ENSMUSG00000019970	6.68884	0.624214	0.0933217	1.54137	0	UP
Gapdh	ENSMUSG00000057666	9.35457	0.619493	0.0662236	1.53634	0	UP
Itih5	ENSMUSG00000025780	8.86877	0.617857	0.0696666	1.53459	0	UP
S100a1	ENSMUSG00000044080	8.59692	0.616869	0.0717547	1.53354	0	UP
Ppib	ENSMUSG00000032383	9.29053	0.61071	0.0657346	1.52701	0	UP
Minos1	ENSMUSG00000050608	9.92728	0.610599	0.0615072	1.52689	0	UP
Rbp1	ENSMUSG00000046402	7.41628	0.609168	0.0821393	1.52538	0	UP
Rcn3	ENSMUSG00000019539	8.76887	0.608949	0.0694444	1.52515	0	UP
Serf2	ENSMUSG00000074884	11.069	0.60751	0.0548838	1.52363	0	UP
Pdlim1	ENSMUSG00000055044	9.95082	0.603774	0.0606758	1.51969	0	UP
Serpinb6a	ENSMUSG00000060147	8.86324	0.603201	0.0680565	1.51908	0	UP
Ptms	ENSMUSG00000030122	9.48827	0.602844	0.0635357	1.51871	0	UP
B2m	ENSMUSG00000060802	9.12125	0.600029	0.0657837	1.51575	0	UP
Clic1	ENSMUSG00000007041	8.99281	0.599354	0.0666482	1.51504	0	UP
Dap	ENSMUSG00000039168	9.59349	0.597783	0.0623113	1.51339	0	UP
Ugp2	ENSMUSG00000001891	9.32494	0.596	0.0639146	1.51152	0	UP
Pmp22	ENSMUSG00000018217	8.13295	0.592363	0.0728349	1.50771	0	UP
Maged2	ENSMUSG00000025268	8.60063	0.592041	0.068837	1.50738	0	UP
Ppic	ENSMUSG00000024538	8.56063	0.590004	0.0689207	1.50525	0	UP
Ap2m1	ENSMUSG00000022841	9.48442	0.588645	0.0620645	1.50383	0	UP
Rhoc	ENSMUSG00000002233	8.44284	0.586549	0.069473	1.50165	0	UP
Dpysl2	ENSMUSG00000022048	9.13118	0.585449	0.0641154	1.50051	0	UP
Rhob	ENSMUSG00000054364	6.41672	0.585261	0.0912088	1.50031	0	UP
Steap4	ENSMUSG00000012428	-6.92016	-0.592117	0.085564	-1.50746	0	DOWN
Socs3	ENSMUSG00000053113	-6.59168	-0.695965	0.105582	-1.61997	0	DOWN
Hp	ENSMUSG00000031722	-5.95709	-0.796121	0.133643	-1.73643	0	DOWN
Igf1	ENSMUSG00000020053	-7.09588	-0.863128	0.121638	-1.81898	0	DOWN
Fam150b	ENSMUSG00000054204	-8.50857	-0.898576	0.105608	-1.86422	0	DOWN
Col6a5	ENSMUSG00000091345	-9.56683	-0.925366	0.0967265	-1.89917	0	DOWN
Fabp4	ENSMUSG00000062515	-7.00828	-0.95726	0.13659	-1.94162	0	DOWN
Sult1e1	ENSMUSG00000029272	-8.72201	-1.06546	0.122157	-2.09283	0	DOWN
Inmt	ENSMUSG00000003477	-8.27103	-1.09611	0.132524	-2.13777	0	DOWN
Apoe	ENSMUSG00000002985	-8.69839	-1.16596	0.134043	-2.24383	0	DOWN
