# Supplementary material for: Refining the adipose progenitor cell landscape in healthy and obese visceral adipose tissue using single-cell gene expression profiling
Source: Life Sci Alliance. 2019 Nov 25;2(6):e201900561. doi: 10.26508/lsa.201900561 (PMC6878222; doi:10.26508/lsa.201900561)
Supplement: Supplementary file 12 [file LSA-2019-00561_TableS7.xlsx]

## Sheet: cluster2
cluster2	Row	Gene symbol	Gene ID	Score(d)	Numerator(r)	Denominator(s+s0)	Fold Change	q-value(%)	UP or DOWN in group 2 vs. group 1 of Cluster 2
39	7310	Ptx3	ENSMUSG00000027832	12.3127	1.44705	0.117526	2.72651	0	UP
2	15968	Ubb	ENSMUSG00000019505	19.8454	1.43313	0.0722149	2.70032	0	UP
76	16701	Ccl11	ENSMUSG00000020676	10.7943	1.39751	0.129468	2.63447	0	UP
14	16692	Socs3	ENSMUSG00000053113	14.1503	1.27671	0.0902255	2.42287	0	UP
17	13727	Mt2	ENSMUSG00000031762	13.7067	1.24613	0.0909142	2.37204	0	UP
1	12983	Dcn	ENSMUSG00000019929	20.5981	1.21177	0.058829	2.31621	0	UP
145	9227	Cxcl1	ENSMUSG00000029380	9.53814	1.14872	0.120434	2.21717	0	UP
38	12218	Tcf21	ENSMUSG00000045680	12.3254	1.14843	0.0931757	2.21673	0	UP
5	6667	Gm8797	ENSMUSG00000103034	17.0897	1.14256	0.0668569	2.20773	0	UP
6	7305	Gstm1	ENSMUSG00000058135	17.0634	1.13958	0.0667851	2.20318	0	UP
121	13725	Hp	ENSMUSG00000031722	9.96201	1.0852	0.108934	2.12168	0	UP
215	9226	Il6	ENSMUSG00000025746	8.5119	1.06073	0.124617	2.08598	0	UP
42	8559	Id3	ENSMUSG00000007872	12.0637	1.05345	0.0873246	2.07549	0	UP
33	6113	Cebpb	ENSMUSG00000056501	12.5182	1.04214	0.08325	2.05928	0	UP
4	13724	Junb	ENSMUSG00000052837	17.6301	1.03863	0.0589122	2.05427	0	UP
8	17181	Ctsl	ENSMUSG00000021477	15.7814	1.02719	0.0650886	2.03805	0	UP
3	1810	H2-D1	ENSMUSG00000073411	18.2556	1.02528	0.0561624	2.03535	0	UP
9	13709	Uba52	ENSMUSG00000090137	15.7294	1.0252	0.0651771	2.03524	0	UP
10	5513	Serping1	ENSMUSG00000023224	15.5099	1.00872	0.065037	2.01212	0	UP
158	12979	Phlda1	ENSMUSG00000020205	9.3281	0.99287	0.106439	1.99014	0	UP
12	13715	Dpep1	ENSMUSG00000019278	15.3598	0.98934	0.0644108	1.98528	0	UP
23	8558	Plpp3	ENSMUSG00000028517	13.2364	0.98387	0.0743309	1.97776	0	UP
110	9221	Sult1e1	ENSMUSG00000029272	10.1724	0.977842	0.096127	1.96952	0	UP
26	13728	Mt1	ENSMUSG00000031765	12.9925	0.962171	0.074056	1.94824	0	UP
32	15217	Hspa8	ENSMUSG00000015656	12.5772	0.952408	0.075725	1.9351	0	UP
11	10689	Rarres2	ENSMUSG00000009281	15.413	0.947668	0.0614849	1.92875	0	UP
48	6110	Procr	ENSMUSG00000027611	11.7831	0.942126	0.0799554	1.92136	0	UP
98	6107	Thbd	ENSMUSG00000074743	10.3905	0.936129	0.090095	1.91339	0	UP
365	16703	Ccl2	ENSMUSG00000035385	7.06168	0.930664	0.131791	1.90615	0	UP
143	1823	Has1	ENSMUSG00000003665	9.57467	0.921243	0.0962167	1.89375	0	UP
21	15962	Eif5a	ENSMUSG00000078812	13.5086	0.914393	0.0676898	1.88478	0	UP
13	5033	Uap1	ENSMUSG00000026670	14.2949	0.912072	0.063804	1.88175	0	UP
27	7299	Ecm1	ENSMUSG00000028108	12.9638	0.908242	0.0700599	1.87676	0	UP
7	14468	Itm2b	ENSMUSG00000022108	16.1461	0.90799	0.056236	1.87643	0	UP
218	7307	Fabp4	ENSMUSG00000062515	8.48948	0.876445	0.103239	1.83585	0	UP
108	3690	Fst	ENSMUSG00000021765	10.2284	0.871877	0.0852408	1.83004	0	UP
15	15211	Rpl4	ENSMUSG00000032399	13.9048	0.86123	0.0619374	1.81659	0	UP
176	1962	Rcan1	ENSMUSG00000022951	8.9562	0.857791	0.0957762	1.81226	0	UP
162	3685	Fam150b	ENSMUSG00000054204	9.23946	0.852962	0.0923173	1.8062	0	UP
24	13698	Cyba	ENSMUSG00000006519	13.1623	0.827911	0.0629004	1.77511	0	UP
22	15948	Eif4a1	ENSMUSG00000059796	13.4475	0.820998	0.0610521	1.76663	0	UP
74	1778	Lrrn4cl	ENSMUSG00000071656	10.9607	0.802942	0.0732563	1.74465	0	UP
142	5026	Glul	ENSMUSG00000026473	9.57927	0.801543	0.0836747	1.74296	0	UP
18	1779	Cyb5a	ENSMUSG00000024646	13.651	0.797669	0.0584329	1.73829	0	UP
254	9953	Hspb1	ENSMUSG00000004951	8.19795	0.797165	0.0972395	1.73768	0	UP
28	12223	Ifitm3	ENSMUSG00000025492	12.8615	0.796588	0.0619361	1.73699	0	UP
30	2687	Rpl3	ENSMUSG00000060036	12.6893	0.794436	0.0626069	1.7344	0	UP
36	12210	Ifitm2	ENSMUSG00000060591	12.382	0.792393	0.0639953	1.73194	0	UP
58	1817	Anxa1	ENSMUSG00000024659	11.354	0.791192	0.069684	1.7305	0	UP
61	16699	H3f3b	ENSMUSG00000016559	11.2232	0.788791	0.0702824	1.72763	0	UP
20	12195	Aldoa	ENSMUSG00000030695	13.5499	0.776264	0.0572894	1.71269	0	UP
16	15966	Ppia	ENSMUSG00000071866	13.8131	0.772418	0.055919	1.70813	0	UP
146	8557	Errfi1	ENSMUSG00000028967	9.5381	0.771301	0.0808652	1.70681	0	UP
100	3064	Myc	ENSMUSG00000022346	10.3761	0.770821	0.0742881	1.70624	0	UP
243	10692	Inmt	ENSMUSG00000003477	8.25987	0.76818	0.0930014	1.70312	0	UP
242	1798	Cdkn1a	ENSMUSG00000023067	8.26321	0.760031	0.0919777	1.69353	0	UP
34	12968	Eef2	ENSMUSG00000034994	12.4126	0.759513	0.0611891	1.69292	0	UP
68	16700	Actg1	ENSMUSG00000062825	11.0155	0.755153	0.0685536	1.68781	0	UP
157	3067	Ly6c1	ENSMUSG00000079018	9.33561	0.755037	0.0808771	1.68768	0	UP
72	10694	Mfap5	ENSMUSG00000030116	10.9807	0.752958	0.0685713	1.68524	0	UP
46	8549	Prdx1	ENSMUSG00000028691	11.9284	0.751608	0.0630097	1.68367	0	UP
52	6673	Rpl10	ENSMUSG00000008682	11.6172	0.749946	0.0645545	1.68173	0	UP
57	13718	Gm8730	ENSMUSG00000063696	11.4118	0.749686	0.0656937	1.68143	0	UP
86	2679	Pla1a	ENSMUSG00000002847	10.638	0.749328	0.0704385	1.68101	0	UP
31	12956	Atp5b	ENSMUSG00000025393	12.5893	0.748655	0.0594678	1.68023	0	UP
49	9950	Rplp0	ENSMUSG00000067274	11.678	0.748069	0.0640579	1.67954	0	UP
228	3692	Nfkbia	ENSMUSG00000021025	8.38574	0.747533	0.0891433	1.67892	0	UP
37	1785	Myl12a	ENSMUSG00000024048	12.3611	0.744779	0.0602516	1.67572	0	UP
29	9949	Rpl21	ENSMUSG00000041453	12.7533	0.74392	0.0583316	1.67472	0	UP
55	9911	Arpc3	ENSMUSG00000029465	11.5072	0.742707	0.0645431	1.67331	0	UP
65	15963	Efemp1	ENSMUSG00000020467	11.0689	0.740596	0.0669078	1.67087	0	UP
88	3687	Arl4a	ENSMUSG00000047446	10.5935	0.740541	0.0699053	1.6708	0	UP
189	9225	Igfbp7	ENSMUSG00000036256	8.8341	0.740317	0.0838021	1.67054	0	UP
43	5515	Gsn	ENSMUSG00000026879	11.9771	0.737253	0.0615554	1.667	0	UP
45	15220	Clec3b	ENSMUSG00000025784	11.9479	0.732192	0.0612819	1.66116	0	UP
212	3386	Tnfaip2	ENSMUSG00000021281	8.54234	0.728936	0.0853321	1.65742	0	UP
119	4353	Serpine2	ENSMUSG00000026249	10.0044	0.723443	0.0723128	1.65112	0	UP
40	15215	Rpl14	ENSMUSG00000025794	12.1525	0.719703	0.0592225	1.64684	0	UP
54	10653	C1rb	ENSMUSG00000098470	11.5164	0.71953	0.0624789	1.64665	0	UP
35	9946	Rpl6	ENSMUSG00000029614	12.4028	0.714687	0.0576229	1.64113	0	UP
50	6112	B2m	ENSMUSG00000060802	11.6658	0.713161	0.0611326	1.63939	0	UP
25	1710	Acaa2	ENSMUSG00000036880	12.9951	0.712668	0.0548414	1.63883	0	UP
70	14461	Rpl15	ENSMUSG00000012405	11.0011	0.712132	0.064733	1.63822	0	UP
67	3070	Sepp1	ENSMUSG00000064373	11.0431	0.705939	0.0639259	1.63121	0	UP
53	9909	Aldh2	ENSMUSG00000029455	11.5324	0.704037	0.0610484	1.62906	0	UP
63	1791	Calm2	ENSMUSG00000036438	11.1687	0.702741	0.0629207	1.62759	0	UP
96	14464	Gm10709	ENSMUSG00000074516	10.4155	0.701075	0.067311	1.62572	0	UP
335	3068	Maff	ENSMUSG00000042622	7.27252	0.696037	0.0957078	1.62005	0	UP
47	8530	Tmem59	ENSMUSG00000028618	11.8651	0.695949	0.058655	1.61995	0	UP
207	5514	Tnfaip6	ENSMUSG00000053475	8.60665	0.69353	0.0805808	1.61724	0	UP
231	10684	Gadd45a	ENSMUSG00000036390	8.37702	0.693487	0.0827844	1.61719	0	UP
44	1818	Rpl17	ENSMUSG00000062328	11.9661	0.693178	0.0579284	1.61684	0	UP
129	3072	Ly6a	ENSMUSG00000075602	9.82122	0.692739	0.070535	1.61635	0	UP
41	16690	Rpl19	ENSMUSG00000017404	12.1358	0.689539	0.0568185	1.61277	0	UP
166	9204	Slc10a6	ENSMUSG00000029321	9.18068	0.686955	0.0748262	1.60988	0	UP
255	7918	Penk	ENSMUSG00000045573	8.19671	0.681401	0.083131	1.6037	0	UP
62	10652	C1ra	ENSMUSG00000055172	11.1796	0.67796	0.0606429	1.59988	0	UP
19	16696	Eif1	ENSMUSG00000035530	13.6388	0.676486	0.0496002	1.59824	0	UP
51	16683	Ddx5	ENSMUSG00000020719	11.6572	0.675383	0.0579368	1.59702	0	UP
124	15207	Pcolce2	ENSMUSG00000015354	9.95961	0.673071	0.06758	1.59446	0	UP
123	10676	Mgst1	ENSMUSG00000008540	9.96162	0.671556	0.0674144	1.59279	0	UP
80	13680	Map1lc3b	ENSMUSG00000031812	10.7428	0.668409	0.0622194	1.58932	0	UP
234	11414	Zfp36	ENSMUSG00000044786	8.32335	0.668392	0.0803032	1.5893	0	UP
139	9947	Ubc	ENSMUSG00000008348	9.64125	0.66783	0.0692679	1.58868	0	UP
56	1788	Cfl1	ENSMUSG00000056201	11.4533	0.66668	0.0582086	1.58742	0	UP
104	12971	Cd63	ENSMUSG00000025351	10.3242	0.663872	0.0643024	1.58433	0	UP
161	15954	Gfpt2	ENSMUSG00000020363	9.24128	0.663213	0.0717663	1.58361	0	UP
69	6108	Gnas	ENSMUSG00000027523	11.0086	0.658681	0.0598333	1.57864	0	UP
260	6115	Cst3	ENSMUSG00000027447	8.15075	0.658117	0.0807432	1.57802	0	UP
99	5497	Cd302	ENSMUSG00000060703	10.3886	0.655829	0.0631299	1.57552	0	UP
107	7289	Rhoc	ENSMUSG00000002233	10.2344	0.655393	0.0640384	1.57505	0	UP
209	13717	Ier2	ENSMUSG00000053560	8.5826	0.655144	0.076334	1.57477	0	UP
75	15167	Rpl29	ENSMUSG00000048758	10.8945	0.653429	0.0599779	1.5729	0	UP
78	17179	Gm10260	ENSMUSG00000069117	10.7803	0.649991	0.0602946	1.56916	0	UP
85	2639	Litaf	ENSMUSG00000022500	10.6442	0.649279	0.0609983	1.56838	0	UP
73	10659	Cnbp	ENSMUSG00000030057	10.9773	0.644318	0.0586957	1.563	0	UP
109	1776	Tubb6	ENSMUSG00000001473	10.2284	0.640276	0.0625981	1.55863	0	UP
111	12204	Cd81	ENSMUSG00000037706	10.1307	0.639989	0.063173	1.55832	0	UP
118	11426	Ftl1	ENSMUSG00000050708	10.0104	0.638604	0.063794	1.55682	0	UP
353	6672	Sat1	ENSMUSG00000025283	7.17702	0.637778	0.088864	1.55593	0	UP
125	7306	S100a11	ENSMUSG00000027907	9.90176	0.63579	0.0642099	1.55379	0	UP
89	5500	Slc43a3	ENSMUSG00000027074	10.5851	0.634669	0.0599588	1.55258	0	UP
190	4351	Nop58	ENSMUSG00000026020	8.82948	0.632557	0.0716414	1.55031	0	UP
94	3691	Rps7	ENSMUSG00000061477	10.4682	0.629334	0.0601186	1.54685	0	UP
163	5030	Ier5	ENSMUSG00000056708	9.23749	0.628277	0.0680138	1.54572	0	UP
127	10665	Capg	ENSMUSG00000056737	9.86103	0.626896	0.0635731	1.54424	0	UP
64	14460	Rnase4	ENSMUSG00000021876	11.0917	0.626799	0.0565105	1.54413	0	UP
181	5028	Hsd11b1	ENSMUSG00000016194	8.9021	0.626526	0.0703796	1.54384	0	UP
101	11393	Fcgrt	ENSMUSG00000003420	10.3735	0.625893	0.060336	1.54317	0	UP
202	9216	Anxa3	ENSMUSG00000029484	8.67365	0.623652	0.0719019	1.54077	0	UP
66	9218	Rpl9	ENSMUSG00000047215	11.0656	0.623109	0.0563103	1.54019	0	UP
79	1831	Fth1	ENSMUSG00000024661	10.7647	0.621863	0.0577688	1.53886	0	UP
287	16688	Metrnl	ENSMUSG00000039208	7.7207	0.620336	0.0803471	1.53723	0	UP
117	12185	Rnh1	ENSMUSG00000038650	10.0128	0.616524	0.0615735	1.53318	0	UP
120	12936	Rpl6l	ENSMUSG00000091086	10.0016	0.613236	0.0613139	1.52969	0	UP
122	11421	Rps11	ENSMUSG00000003429	9.96166	0.611455	0.0613809	1.5278	0	UP
82	11411	Rpl18	ENSMUSG00000059070	10.7009	0.609477	0.0569558	1.52571	0	UP
116	4357	Rpl31	ENSMUSG00000073702	10.054	0.609412	0.0606139	1.52564	0	UP
179	3381	Hsp90aa1	ENSMUSG00000021270	8.93741	0.609319	0.0681762	1.52554	0	UP
60	15219	Eef1a1	ENSMUSG00000037742	11.2647	0.606042	0.0538	1.52208	0	UP
377	9220	Ugdh	ENSMUSG00000029201	6.98118	0.604348	0.0865681	1.52029	0	UP
71	6674	Rps4x	ENSMUSG00000031320	10.9971	0.603818	0.0549072	1.51973	0	UP
105	11416	Rps17	ENSMUSG00000061787	10.3019	0.603394	0.058571	1.51929	0	UP
173	3374	Fbln5	ENSMUSG00000021186	9.07318	0.600769	0.0662137	1.51652	0	UP
112	9913	Gnb2	ENSMUSG00000029713	10.1005	0.597107	0.0591165	1.51268	0	UP
84	8544	Park7	ENSMUSG00000028964	10.6539	0.594004	0.0557548	1.50943	0	UP
205	7909	Dnaja1	ENSMUSG00000028410	8.63546	0.593398	0.0687164	1.5088	0	UP
91	13723	Rpl13	ENSMUSG00000000740	10.5126	0.592773	0.0563869	1.50814	0	UP
301	1832	Malat1	ENSMUSG00000092341	7.56691	0.590969	0.078099	1.50626	0	UP
81	4355	Rpl7	ENSMUSG00000043716	10.713	0.590325	0.0551035	1.50559	0	UP
126	3684	Laptm4a	ENSMUSG00000020585	9.89001	0.589111	0.0595663	1.50432	0	UP
257	5505	Wt1	ENSMUSG00000016458	8.17464	0.586239	0.0717144	1.50133	0	UP
7231	4347	Col6a3	ENSMUSG00000048126	-9.60638	-0.601747	0.0626403	-1.51755	0	DOWN
7232	7902	Col15a1	ENSMUSG00000028339	-8.90399	-0.602101	0.0676215	-1.51793	0	DOWN
7233	16698	Col1a1	ENSMUSG00000001506	-7.43716	-0.637031	0.0856552	-1.55513	0	DOWN
7230	4363	Col3a1	ENSMUSG00000026043	-10.3113	-0.981965	0.0952321	-1.97515	0	DOWN
