# Supplementary material for: Refining the adipose progenitor cell landscape in healthy and obese visceral adipose tissue using single-cell gene expression profiling
Source: Life Sci Alliance. 2019 Nov 25;2(6):e201900561. doi: 10.26508/lsa.201900561 (PMC6878222; doi:10.26508/lsa.201900561)
Supplement: Supplementary file 13 [file LSA-2019-00561_TableS8.xlsx]

## Sheet: cluster4
cluster4	Row	Gene symbol	Gene ID	Score(d)	Numerator(r)	Denominator(s+s0)	Fold Change	q-value(%)	UP or DOWN in group 2 vs. group 1 of Cluster 4
1	7307	Fabp4	ENSMUSG00000062515	12.5323	1.83904	0.146744	3.57771	0	UP
3	16701	Ccl11	ENSMUSG00000020676	8.60784	1.36539	0.158622	2.57646	0	UP
2	13726	Lpl	ENSMUSG00000015568	9.48928	1.34144	0.141364	2.53404	0	UP
7	5509	Thbs1	ENSMUSG00000040152	7.35151	0.986516	0.134192	1.98139	0	UP
4	3685	Fam150b	ENSMUSG00000054204	8.08632	0.919643	0.113728	1.89165	0	UP
34	7310	Ptx3	ENSMUSG00000027832	4.91755	0.788493	0.160343	1.72727	0	UP
8	5028	Hsd11b1	ENSMUSG00000016194	6.79289	0.768485	0.113131	1.70348	0	UP
82	15221	Trf	ENSMUSG00000032554	3.93481	0.758248	0.192702	1.69143	0	UP
6	13728	Mt1	ENSMUSG00000031765	7.49175	0.680393	0.0908189	1.60258	0	UP
57	9227	Cxcl1	ENSMUSG00000029380	4.30088	0.673316	0.156553	1.59473	0	UP
59	15972	Gpx3	ENSMUSG00000018339	4.29539	0.66152	0.154007	1.58175	0	UP
11	7281	Tsc22d2	ENSMUSG00000027806	6.23182	0.596473	0.0957141	1.51202	0	UP
5	15925	Vtn	ENSMUSG00000017344	7.81818	0.587031	0.0750854	1.50215	0	UP
434	12206	Lsp1	ENSMUSG00000018819	-7.67934	-0.58591	0.0762969	-1.50099	0	DOWN
607	9948	Serpine1	ENSMUSG00000037411	-4.06477	-0.593051	0.1459	-1.50843	0	DOWN
419	6067	Sulf2	ENSMUSG00000006800	-8.73825	-0.599964	0.0686595	-1.51568	0	DOWN
426	6056	Prnp	ENSMUSG00000079037	-8.26169	-0.602457	0.0729218	-1.5183	0	DOWN
435	1782	Cd248	ENSMUSG00000056481	-7.63773	-0.613267	0.0802944	-1.52972	0	DOWN
479	10686	Emp1	ENSMUSG00000030208	-5.92517	-0.614132	0.103648	-1.53064	0	DOWN
437	15198	Loxl1	ENSMUSG00000032334	-7.46775	-0.620816	0.0831329	-1.53774	0	DOWN
418	10694	Mfap5	ENSMUSG00000030116	-8.90002	-0.621124	0.069789	-1.53807	0	DOWN
429	10652	C1ra	ENSMUSG00000055172	-8.12019	-0.623501	0.0767841	-1.54061	0	DOWN
407	14413	Itgbl1	ENSMUSG00000032925	-10.9214	-0.623592	0.0570983	-1.54071	0	DOWN
421	15951	Pmp22	ENSMUSG00000018217	-8.4868	-0.630305	0.0742688	-1.54789	0	DOWN
422	16680	Tmem100	ENSMUSG00000069763	-8.37145	-0.645299	0.0770832	-1.56406	0	DOWN
432	6663	Maged2	ENSMUSG00000025268	-7.89049	-0.646173	0.0818927	-1.56501	0	DOWN
427	10653	C1rb	ENSMUSG00000098470	-8.23497	-0.647001	0.0785674	-1.56591	0	DOWN
448	15207	Pcolce2	ENSMUSG00000015354	-7.0631	-0.65238	0.0923645	-1.57176	0	DOWN
420	8536	Mfap2	ENSMUSG00000060572	-8.671	-0.652932	0.0753007	-1.57236	0	DOWN
430	11400	Fxyd5	ENSMUSG00000009687	-8.01912	-0.659143	0.0821965	-1.57914	0	DOWN
439	6092	Lbp	ENSMUSG00000016024	-7.36384	-0.665641	0.0903932	-1.58627	0	DOWN
456	6115	Cst3	ENSMUSG00000027447	-6.75985	-0.66821	0.0988498	-1.5891	0	DOWN
467	11408	Fosb	ENSMUSG00000003545	-6.19382	-0.676082	0.109154	-1.59779	0	DOWN
527	3388	Meg3	ENSMUSG00000021268	-5.02486	-0.689116	0.137141	-1.61229	0	DOWN
485	17180	Gas1	ENSMUSG00000052957	-5.83927	-0.696882	0.119344	-1.621	0	DOWN
460	5034	Atf3	ENSMUSG00000026628	-6.60866	-0.703444	0.106443	-1.62839	0	DOWN
498	1823	Has1	ENSMUSG00000003665	-5.50083	-0.722771	0.131393	-1.65035	0	DOWN
450	15965	Aebp1	ENSMUSG00000020473	-6.95206	-0.72705	0.104581	-1.65525	0	DOWN
413	5011	Cfh	ENSMUSG00000026365	-9.39962	-0.735403	0.0782376	-1.66486	0	DOWN
431	10680	Fbln2	ENSMUSG00000064080	-7.93134	-0.738893	0.0931611	-1.66889	0	DOWN
441	3688	Rhob	ENSMUSG00000054364	-7.31492	-0.744205	0.101738	-1.67505	0	DOWN
442	1802	Smoc2	ENSMUSG00000023886	-7.21255	-0.750417	0.104043	-1.68228	0	DOWN
428	1804	Ier3	ENSMUSG00000003541	-8.17214	-0.770907	0.0943335	-1.70634	0	DOWN
404	15186	Islr	ENSMUSG00000037206	-11.2316	-0.787113	0.0700802	-1.72562	0	DOWN
414	7299	Ecm1	ENSMUSG00000028108	-9.3688	-0.810608	0.0865221	-1.75395	0	DOWN
425	1809	Neat1	ENSMUSG00000092274	-8.28391	-0.841699	0.101607	-1.79216	0	DOWN
412	1807	C3	ENSMUSG00000024164	-9.42905	-0.882198	0.0935617	-1.84318	0	DOWN
406	15208	Cilp	ENSMUSG00000042254	-11.1073	-0.902967	0.0812947	-1.86991	0	DOWN
403	8553	Nbl1	ENSMUSG00000041120	-11.6847	-0.926266	0.0792719	-1.90035	0	DOWN
424	9953	Hspb1	ENSMUSG00000004951	-8.35001	-0.960509	0.115031	-1.946	0	DOWN
433	12981	Lum	ENSMUSG00000036446	-7.75738	-0.961246	0.123914	-1.94699	0	DOWN
408	15970	Mfap4	ENSMUSG00000042436	-10.8433	-1.00445	0.0926338	-2.00618	0	DOWN
415	12970	Sfrp1	ENSMUSG00000031548	-9.32908	-1.01924	0.109254	-2.02685	0	DOWN
405	1830	Pi16	ENSMUSG00000024011	-11.1779	-1.02244	0.0914694	-2.03135	0	DOWN
416	7920	Klf4	ENSMUSG00000003032	-9.20915	-1.04841	0.113844	-2.06825	0	DOWN
417	9951	Eln	ENSMUSG00000029675	-9.17779	-1.10113	0.119977	-2.14522	0	DOWN
402	3067	Ly6c1	ENSMUSG00000079018	-11.765	-1.19892	0.101906	-2.29568	0	DOWN
398	10682	Cd9	ENSMUSG00000030342	-12.8963	-1.28194	0.0994038	-2.43165	0	DOWN
409	8561	Jun	ENSMUSG00000052684	-10.703	-1.31155	0.122541	-2.48208	0	DOWN
399	2682	Fbln1	ENSMUSG00000006369	-12.4196	-1.31491	0.105874	-2.48788	0	DOWN
400	6671	Bgn	ENSMUSG00000031375	-12.3949	-1.36789	0.11036	-2.58093	0	DOWN
411	3389	Fos	ENSMUSG00000021250	-9.60764	-1.3851	0.144167	-2.61191	0	DOWN
397	13719	Klf2	ENSMUSG00000055148	-14.6711	-1.85393	0.126366	-3.61484	0	DOWN
401	10695	Mgp	ENSMUSG00000030218	-12.2765	-1.93203	0.157377	-3.81591	0	DOWN
